# Supplementary material
Source: PubMed Central journal article supplement (PMC6602858)
Supplement: NIHMS1530107-supplement-1.pdf [file NIHMS1530107-supplement-1.pdf]

## Supplementary figures

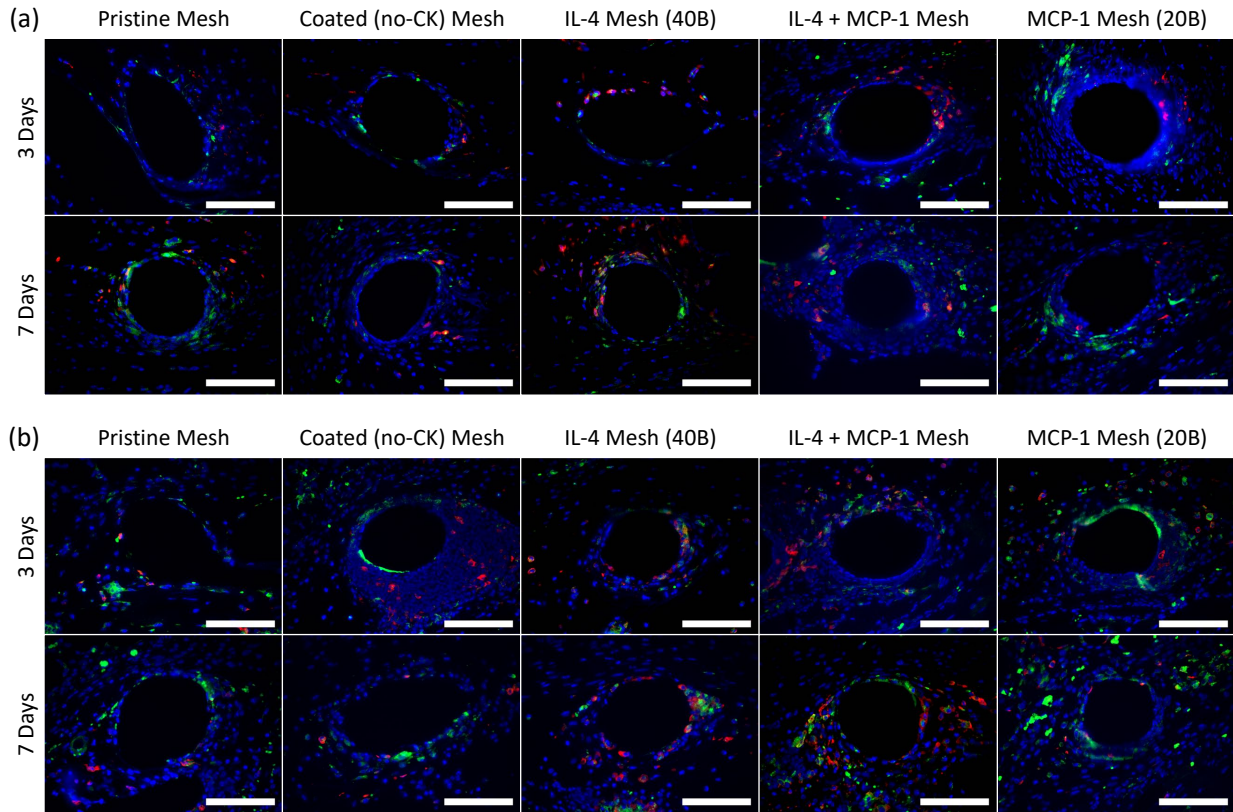

**Figure S1.** Fluorescence microscopy images of arginase-1 (red, M2-macrophage marker) and F4/80 (green, pan macrophage marker) co-immunolabelled tissue sections from (a) young and (b) aged mice implanted with a 1 cm<sup>2</sup> piece of pristine, coated (no cytokine), single and sequential MCP-1 and IL-4 eluting meshes, 3 and 7 days post-implantation. DAPI was used to stain cell nuclei. Scale bars represent 50  $\mu$ m.

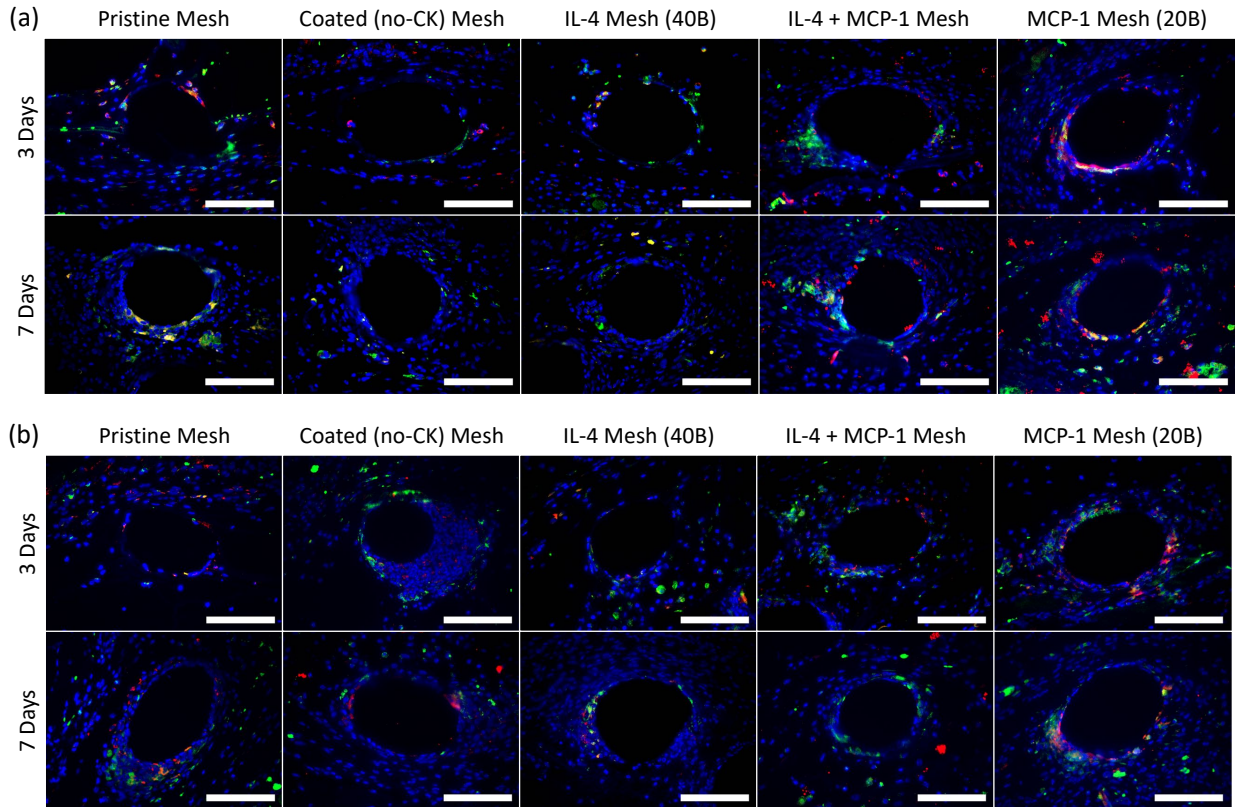

**Figure S2.** Fluorescence microscopy images of iNOS (red, M1-macrophage marker) and F4/80 (green, pan macrophage marker) co-immunolabelled tissue sections from (a) young and (b) aged mice implanted with a 1 cm<sup>2</sup> piece of pristine, coated (no cytokine), single and sequential MCP-1 and IL-4 eluting meshes, 3 and 7 days post-implantation. DAPI was used to stain cell nuclei. Scale bars represent 50 μm.

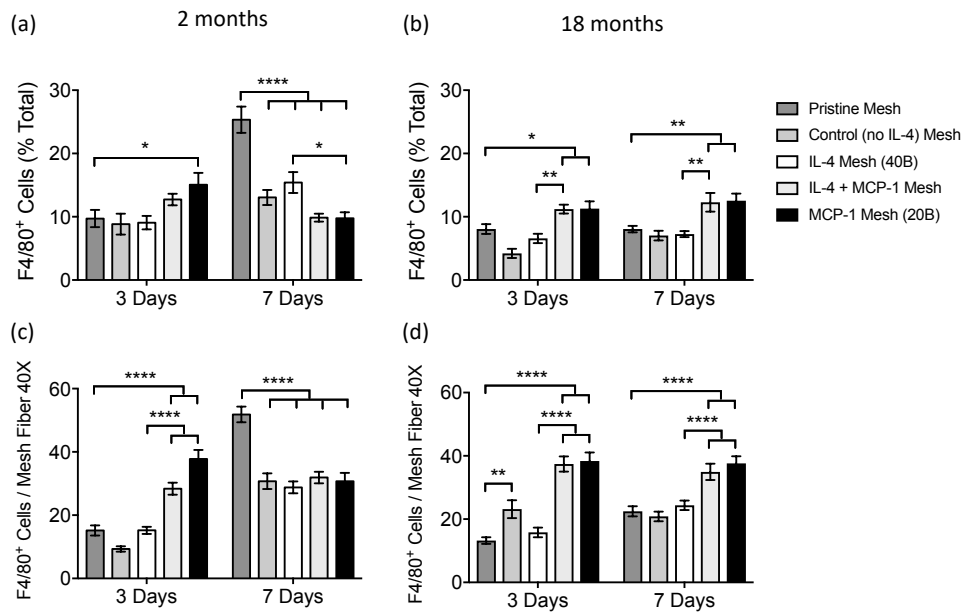

**Figure S3.** Image analysis of F4/80<sup>+</sup> macrophages as percentages of total cells (a, b) and number (c, d) surrounding single mesh fibers of tissue cross sections from young (a, c) and aged (b, d) mice implanted with a 1 cm<sup>2</sup> piece of pristine, coated (no cytokine), single and sequential MCP-1 and IL-4 eluting meshes, 3 and 7 days post-implantation. Bars represent the mean ± SEM (N = 8).

Statistical significance as (\*)  $p < 0.05$ , (\*\*)  $p < 0.01$ , (\*\*\*)  $p < 0.001$  and (\*\*\*\*)  $p < 0.0001$ , using two-way ANOVA with Tukey's (groups) and Sidak's (days) tests. All other differences are non-significant.

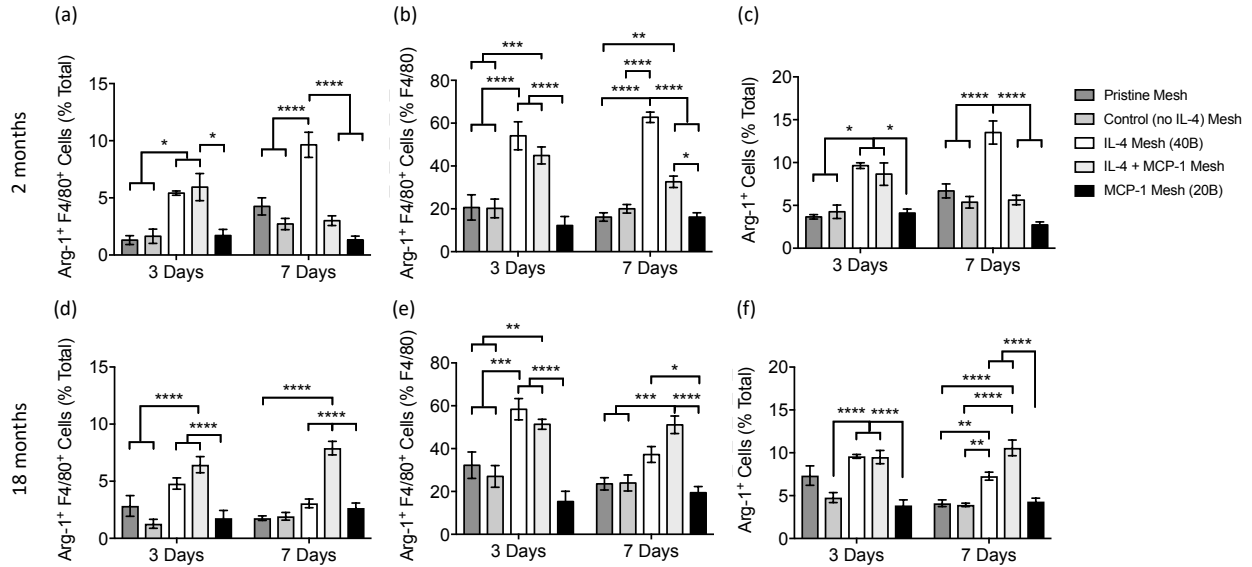

**Figure S4.** Image analysis of Arg-1<sup>+</sup> F4/80<sup>+</sup> macrophages as percentages of total cells (a, d) and F4/80<sup>+</sup> macrophages (b, e), as well as total percentage of Arg-1<sup>+</sup> cells (c, f), surrounding single mesh fibers of tissue cross sections from young (a - c) and aged (d - f) mice implanted with a 1 cm<sup>2</sup> piece of pristine, coated (no cytokine), single and sequential MCP-1 and IL-4 eluting meshes, 3 and 7 days post-implantation. Bars represent the mean  $\pm$  SEM (N = 8). Statistical significance as (\*)  $p < 0.05$ , (\*\*)  $p < 0.01$ , (\*\*\*)  $p < 0.001$  and (\*\*\*\*)  $p < 0.0001$ , using two-way ANOVA with Tukey's (groups) and Sidak's (days) tests. All other differences are non-significant.

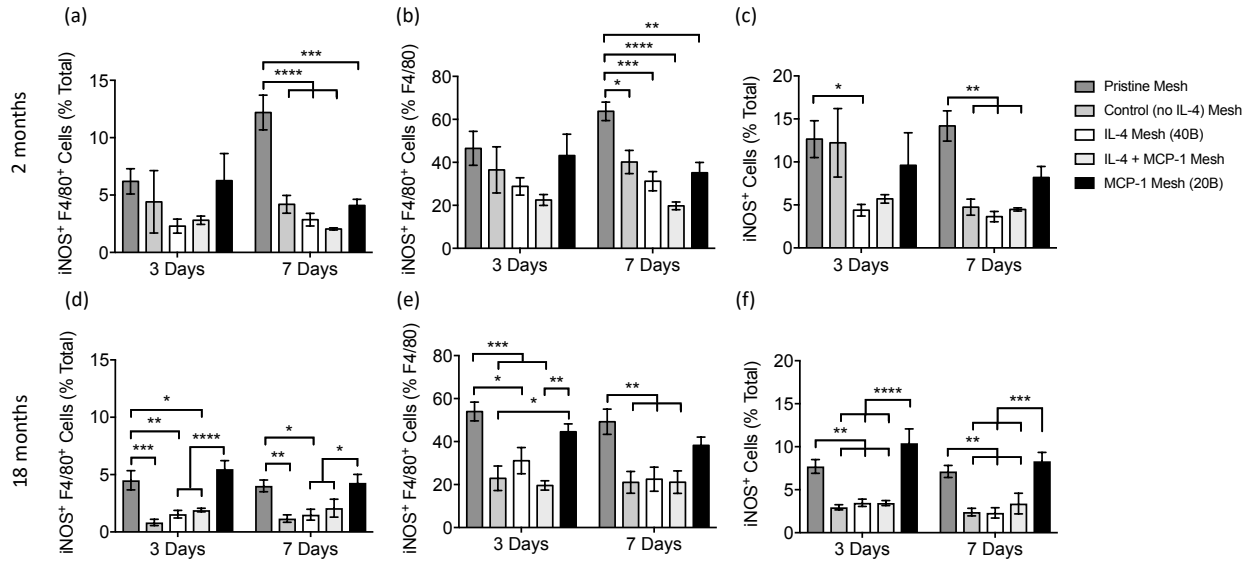

**Figure S5.** Image analysis of iNOS<sup>+</sup> F4/80<sup>+</sup> macrophages as percentages of total cells (a, d) and F4/80<sup>+</sup> macrophages (b, e), as well as total percentage of iNOS<sup>+</sup> cells (c, f), surrounding single mesh fibers of tissue cross sections from young (a - c) and aged (d - f) mice implanted with a 1 cm<sup>2</sup> piece of pristine, coated (no cytokine), single and sequential MCP-1 and IL-4 eluting meshes, 3 and 7 days post-implantation. Bars represent the mean  $\pm$  SEM (N = 8). Statistical significance as (\*)  $p < 0.05$ , (\*\*)  $p < 0.01$ , (\*\*\*)  $p < 0.001$  and (\*\*\*\*)  $p < 0.0001$ , using two-way ANOVA with Tukey's (groups) and Sidak's (days) tests. All other differences are non-significant.
